# Supplementary material for: Moringin Induces Neural Differentiation in the Stem Cell of the Human Periodontal Ligament
Source: PubMed Central journal article supplement (PMC6002387; doi:10.1038/s41598-018-27492-0), 2018-06-14
Supplement: 41598_2018_27492_MOESM1_ESM.pdf [file 41598_2018_27492_MOESM1_ESM.pdf]

# MORINGIN INDUCES NEURAL DIFFERENTIATION IN THE STEM CELL OF THE HUMAN PERIODONTAL LIGAMENT

**Letizia Romeo<sup>1</sup>, Francesca Diomede<sup>2</sup>, Agnese Gugliandolo<sup>1</sup>, Domenico Scionti<sup>1</sup>, Fabrizio Lo Giudice<sup>1</sup>, Veronica Lanza Cariccio<sup>1</sup>, Renato Iori<sup>3</sup>, Placido Bramanti<sup>1</sup>, Oriana Trubiani<sup>2</sup> and Emanuela Mazzon<sup>1\*</sup>**

1. IRCCS Centro Neurolesi "Bonino-Pulejo", Via Provinciale Palermo, Contrada Casazza, 98124 Messina, Italy;
2. Department of medical, oral and biotechnological sciences, University "G. d'Annunzio" Chieti-Pescara, Chieti, Italy;
3. Consiglio per la ricerca in agricoltura e l'analisi dell'economia agraria, Centro di ricerca Agricoltura e Ambiente (CREA-AA), Via di Corticella 133, 40128, Bologna, Italy.;  
renato.iori48@gmail.com

\*Correspondence: emazzon.irccs@gmail.com; Tel.: +39-090-60128172

| GENE      | CTR    | MORINGIN<br>0,5µM | LFC  | CLUSTER | STAGE ASSOCIATIONS                                                    |
|-----------|--------|-------------------|------|---------|-----------------------------------------------------------------------|
| TACC3     | 2,08   | 24,51             | 3,56 | 1       | Cortical Specification, Upper Layers                                  |
| RAD54L    | 0,67   | 7,76              | 3,54 | 42      | Cortical Specifications                                               |
| KIF18B    | 0,26   | 2,95              | 3,53 | 42      | Cortical Specifications                                               |
| AURKB     | 0,51   | 5,93              | 3,53 | 14      | Cortical Specifications                                               |
| TOP2A     | 6,35   | 72,13             | 3,50 | 14      | Cortical Specifications                                               |
| ESPL1     | 0,24   | 2,74              | 3,49 | 42      | Cortical Specifications                                               |
| KIF15     | 0,34   | 3,79              | 3,49 | 41      | Neural Differentiation                                                |
| CCNA2     | 1,31   | 14,56             | 3,48 | 42      | Cortical Specifications                                               |
| FAM72A    | 0,31   | 3,51              | 3,48 | 14      | Cortical Specifications                                               |
| GADD45B   | 0,45   | 4,98              | 3,48 | 2       | Neural Differentiation, Cortical Specification, Upper and Deep Layers |
| ZWINT     | 1,08   | 11,57             | 3,43 | 42      | Cortical Specifications                                               |
| SGOL1     | 0,24   | 2,58              | 3,43 | 14      | Cortical Specifications                                               |
| BRIP1     | 0,30   | 3,11              | 3,40 | 42      | Cortical Specifications                                               |
| HIST1H2AG | 116,46 | 1201,16           | 3,37 | 2       | Neural Differentiation, Cortical Specification, Upper and Deep Layers |
| PSRC1     | 0,36   | 3,74              | 3,36 | 14      | Cortical Specifications                                               |
| DLGAP5    | 1,97   | 20,05             | 3,35 | 14      | Cortical Specifications                                               |
| BUB1      | 1,04   | 10,47             | 3,33 | 42      | Cortical Specifications                                               |
| KIF23     | 1,74   | 17,52             | 3,33 | 42      | Cortical Specifications                                               |
| ELN       | 8,92   | 89,07             | 3,32 | 30      | Cortical Specification, Upper and Deep Layers                         |
| FANCA     | 0,55   | 5,48              | 3,31 | 20      | Deep Layers                                                           |
| HIST1H2AE | 51,55  | 504,42            | 3,29 | 40      | Neural Differentiation, Cortical Specification, Upper Layers          |
| ZNF724P   | 1,44   | 14                | 3,28 | 14      | Cortical Specifications                                               |
| CDC20     | 3,38   | 32,36             | 3,26 | 14      | Cortical Specifications                                               |
| SPC24     | 2,32   | 22,22             | 3,26 | 14      | Cortical Specifications                                               |
| NUSAP1    | 2,45   | 23,29             | 3,25 | 37      | Neural Differentiation                                                |
| FANCD2    | 1,28   | 11,98             | 3,23 | 42      | Cortical Specifications                                               |
| GAR1      | 0,32   | 3,06              | 3,23 | 24      | Cortical Specification, Upper and Deep Layers                         |
| HIST1H4I  | 12,55  | 114,71            | 3,19 | 62      | Cortical Specification, Upper Layers                                  |
| RNASEH2A  | 6,13   | 55,84             | 3,19 | 34      | Neural Differentiation, Cortical Specification                        |
| H2AFX     | 6,02   | 54,91             | 3,19 | 14      | Cortical Specifications                                               |
| HIST1H2BF | 100,56 | 917,01            | 3,19 | 11      | Deep Layers                                                           |
| KIF2C     | 1,86   | 16,72             | 3,17 | 14      | Cortical Specifications                                               |
| CASC5     | 0,74   | 6,63              | 3,16 | 45      | Cortical Specification, Upper and Deep Layers                         |
| CEP55     | 1,24   | 11,08             | 3,16 | 37      | Neural Differentiation                                                |
| HIST1H3E  | 2,03   | 17,9              | 3,14 | 42      | Cortical Specifications                                               |

**Table S1. Differentially expressed genes involved in cerebral cortex development induced by 0.5 µM of moringin.** Heat maps show differentially expressed genes that have Log2FoldChange (LFC) > 2 (red scale) and a q-value (FDR) < 0.05, hence genes that after treatment with 0.5 µM of moringin appear overexpressed and statistically significant. The expression's values in the two conditions, CTR- hPDLSCs and MORINGIN- hPDLSCs, are indicated through the FPKM (Fragments Per Kilobase of exon model per Million mapped fragments) and graphically depicted in green scale. Gene cluster and stage association analyzed by Cortecon database were also shown.

| GENE      | CTR    | MORINGIN<br>0,5µM | LFC  | CLUSTER | STAGE ASSOCIATIONS                                           |
|-----------|--------|-------------------|------|---------|--------------------------------------------------------------|
| AURKA     | 4,69   | 40,86             | 3,12 | 42      | Cortical Specifications                                      |
| NDC80     | 2,39   | 20,77             | 3,12 | 14      | Cortical Specifications                                      |
| ANLN      | 3,71   | 32                | 3,11 | 42      | Cortical Specifications                                      |
| CDCA2     | 1,19   | 10,17             | 3,10 | 42      | Cortical Specifications                                      |
| NAV2      | 0,65   | 5,39              | 3,06 | 35      | Upper Layers                                                 |
| TPX2      | 3,78   | 30,96             | 3,04 | 10      | Cortical Specifications                                      |
| IQGAP3    | 1,92   | 15,67             | 3,03 | 14      | Cortical Specifications                                      |
| HIST1H3D  | 49,05  | 396,7             | 3,02 | 40      | Neural Differentiation, Cortical Specification, Upper Layers |
| CDKN3     | 2,66   | 21,45             | 3,01 | 62      | Cortical Specification, Upper Layers                         |
| FOXC2     | 4,78   | 38,11             | 3,00 | 47      | Deep Layers                                                  |
| SPAG5     | 3,12   | 24,72             | 2,99 | 14      | Cortical Specifications                                      |
| CDC45     | 0,59   | 4,56              | 2,95 | 41      | Neural Differentiation                                       |
| NCAPG     | 1,39   | 10,76             | 2,95 | 14      | Cortical Specifications                                      |
| STIL      | 0,98   | 7,53              | 2,95 | 14      | Cortical Specifications                                      |
| TTK       | 1,12   | 8,65              | 2,95 | 14      | Cortical Specifications                                      |
| HIST1H2AD | 100,28 | 769,58            | 2,94 | 14      | Cortical Specifications                                      |
| BRCA1     | 1,20   | 9,02              | 2,92 | 14      | Cortical Specifications                                      |
| HIST1H2BN | 88,53  | 665,05            | 2,91 | 12      | Cortical Specification, Neural Dfferentiation                |
| LMNB1     | 2,30   | 17,02             | 2,89 | 14      | Cortical Specifications                                      |
| DIAPH3    | 2,27   | 16,69             | 2,88 | 42      | Cortical Specifications                                      |
| HIST3H2BB | 3,16   | 23,03             | 2,86 | 63      | Cortical Specifications                                      |
| CCNB1     | 5,72   | 41,54             | 2,86 | 41      | Neural Differentiation                                       |
| CENPF     | 1,89   | 13,75             | 2,86 | 20      | Deep Layers                                                  |
| KIF14     | 0,55   | 4,03              | 2,86 | 14      | Cortical Specifications                                      |
| DEPDC1    | 0,42   | 2,98              | 2,83 | 14      | Cortical Specifications                                      |
| HIST1H2BG | 68,31  | 478,14            | 2,81 | 40      | Neural Differentiation, Cortical Specification, Upper Layers |
| CENPM     | 0,53   | 3,6               | 2,77 | 14      | Cortical Specifications                                      |
| KIAA0101  | 2,29   | 15,24             | 2,74 | 42      | Cortical Specifications                                      |
| CENPE     | 2,08   | 13,78             | 2,73 | 14      | Cortical Specifications                                      |
| KIF22     | 2,45   | 16,3              | 2,73 | 14      | Cortical Specifications                                      |
| MELK      | 2,07   | 13,64             | 2,72 | 42      | Cortical Specifications                                      |
| BORA      | 0,48   | 3,13              | 2,71 | 14      | Cortical Specifications                                      |
| POLA2     | 0,61   | 3,91              | 2,69 | 14      | Cortical Specifications                                      |
| MAOA      | 1,32   | 8,37              | 2,66 | 17      | Cortical Specification, Deep and Upper Layers                |
| ITGA10    | 2,78   | 17,24             | 2,63 | 53      | Cortical Specification, Upper Layers, Deep Layers            |

**Table S2. Differentially expressed genes involved in cerebral cortex development induced by 0.5 µM of moringin.** Heat maps show differentially expressed genes that have Log2FoldChange (LFC) > 2 (red scale) and a q-value (FDR) < 0.05, hence genes that after treatment with 0.5 µM of moringin appear overexpressed and statistically significant. The expression's values in the two conditions, CTR- hPDLSCs and MORINGIN- hPDLSCs, are indicated through the FPKM (Fragments Per Kilobase of exon model per Million mapped fragments) and graphically depicted in green scale. Gene cluster and stage association analyzed by Cortecon database were also shown.

| GENE          | CTR    | MORINGIN<br>0,5µM | LFC  | CLUSTER | STAGE ASSOCIATIONS                            |
|---------------|--------|-------------------|------|---------|-----------------------------------------------|
| ASPM          | 3,02   | 18,27             | 2,60 | 14      | Cortical Specifications                       |
| KIF20A        | 2,96   | 17,9              | 2,60 | 14      | Cortical Specifications                       |
| C15orf41      | 1,24   | 7,41              | 2,58 | 14      | Cortical Specifications                       |
| BIRC5         | 0,75   | 4,45              | 2,56 | 14      | Cortical Specifications                       |
| HIST1H2BD     | 210,01 | 1212,03           | 2,53 | 11      | Deep Layers                                   |
| WISP1         | 1,15   | 6,62              | 2,52 | 24      | Cortical Specification, Upper and Deep Layers |
| INCENP        | 2,66   | 15,22             | 2,52 | 14      | Cortical Specifications                       |
| CRISPLD2      | 1,55   | 8,83              | 2,51 | 13      | Neural Differentiation and Upper Layers       |
| KIF20B        | 0,94   | 5,26              | 2,49 | 42      | Cortical Specifications                       |
| TIMELESS      | 1,43   | 7,98              | 2,48 | 42      | Cortical Specifications                       |
| MMD           | 0,52   | 2,86              | 2,46 | 37      | Neural Differentiation                        |
| CDK2          | 1,89   | 10,29             | 2,45 | 10      | Cortical Specifications                       |
| CMTM1         | 0,62   | 3,3               | 2,41 | 30      | Cortical Specification, Upper and Deep Layers |
| CCNB2         | 3,11   | 16,34             | 2,39 | 42      | Cortical Specifications                       |
| RIMS1         | 0,58   | 3,01              | 2,39 | 42      | Cortical Specifications                       |
| FANCI         | 5,59   | 29,23             | 2,39 | 14      | Cortical Specifications                       |
| ARHGAP11<br>A | 5,84   | 30,1              | 2,37 | 42      | Cortical Specifications                       |
| KIAA1524      | 0,96   | 4,99              | 2,37 | 42      | Cortical Specifications                       |
| KIF11         | 2,47   | 12,74             | 2,37 | 14      | Cortical Specifications                       |
| PRC1          | 5,85   | 29,99             | 2,36 | 45      | Cortical Specification, Upper and Deep Layers |
| RACGAP1       | 5,39   | 27,04             | 2,33 | 14      | Cortical Specifications                       |
| IGF2          | 1,13   | 5,59              | 2,31 | 30      | Cortical Specification, Upper and Deep Layers |
| DHFR          | 1,68   | 8,34              | 2,31 | 10      | Cortical Specifications                       |
| NCAPG2        | 2,36   | 11,66             | 2,30 | 42      | Cortical Specifications                       |
| TMPO          | 4,46   | 21,97             | 2,30 | 25      | Neural Differentiation, Deep Layers           |
| CKS1B         | 5,01   | 24,52             | 2,29 | 14      | Cortical Specifications                       |
| HMGB2         | 8,27   | 40,19             | 2,28 | 37      | Neural Differentiation                        |
| CCDC69        | 0,90   | 4,22              | 2,23 | 42      | Cortical Specifications                       |
| KPNA2         | 28,83  | 135,67            | 2,23 | 42      | Cortical Specifications                       |
| CDC7          | 0,70   | 3,26              | 2,22 | 42      | Cortical Specifications                       |
| FEN1          | 1,25   | 5,81              | 2,22 | 42      | Cortical Specifications                       |
| CKAP2         | 3,86   | 18,02             | 2,22 | 14      | Cortical Specifications                       |
| SYBU          | 1,07   | 4,99              | 2,22 | 14      | Cortical Specifications                       |
| CKS2          | 7,61   | 35,02             | 2,20 | 42      | Cortical Specifications                       |
| FAM64A        | 1,17   | 5,36              | 2,20 | 14      | Cortical Specifications                       |

**Table S3. Differentially expressed genes involved in cerebral cortex development induced by 0.5 µM of moringin.** Heat maps show differentially expressed genes that have Log2FoldChange (LFC) > 2 (red scale) and a q-value (FDR) < 0.05, hence genes that after treatment with 0.5 µM of moringin appear overexpressed and statistically significant. The expression's values in the two conditions, CTR- hPDLSCs and MORINGIN- hPDLSCs, are indicated through the FPKM (Fragments Per Kilobase of exon model per Million mapped fragments) and graphically depicted in green scale. Gene cluster and stage association analyzed by Cortecon database were also shown.

| GENE      | CTR    | MORINGIN<br>0,5µM | LFC  | CLUSTER | STAGE ASSOCIATIONS                                                    |
|-----------|--------|-------------------|------|---------|-----------------------------------------------------------------------|
| HIST2H2BF | 311,67 | 1414,09           | 2,18 | 45      | Cortical Specification, Upper and Deep Layers                         |
| CENPN     | 1,76   | 7,93              | 2,17 | 42      | Cortical Specifications                                               |
| TUBA1C    | 203,37 | 905,9             | 2,16 | 63      | Cortical Specifications                                               |
| CENPA     | 1,07   | 4,76              | 2,16 | 14      | Cortical Specifications                                               |
| DKK1      | 0,82   | 3,65              | 2,16 | 13      | Neural Differentiation, Upper Layers                                  |
| TYMS      | 8,77   | 39,22             | 2,16 | 10      | Cortical Specifications                                               |
| NEIL3     | 0,95   | 4,19              | 2,14 | 42      | Cortical Specifications                                               |
| C11orf70  | 2,26   | 9,8               | 2,12 | 38      | Neural Differentiation, Cortical Specification, Upper and Deep Layers |
| CCBL1     | 0,76   | 3,29              | 2,11 | 42      | Cortical Specifications                                               |
| CEBPD     | 1,00   | 4,28              | 2,10 | 14      | Cortical Specifications                                               |
| PCDH9     | 0,57   | 2,44              | 2,09 | 10      | Cortical Specifications                                               |
| PORCN     | 8,80   | 36,95             | 2,07 | 42      | Cortical Specifications                                               |
| PLCE1     | 2,12   | 8,8               | 2,06 | 33      | Deep Layers                                                           |
| FBF1      | 0,79   | 3,26              | 2,05 | 49      | Neural Differentiation, Cortical Specification, Deep Layers           |
| PSMC3IP   | 5,89   | 23,89             | 2,02 | 10      | Cortical Specifications                                               |
| RFC2      | 2,04   | 8,16              | 2,00 | 20      | Deep Layers                                                           |

**Table S4. Differentially expressed genes involved in cerebral cortex development induced by 0.5 µM of moringin.** Heat maps show differentially expressed genes that have Log2FoldChange (LFC) > 2 (red scale) and a q-value (FDR) < 0.05, hence genes that after treatment with 0.5 µM of moringin appear overexpressed and statistically significant. The expression's values in the two conditions, CTR- hPDLSCs and MORINGIN- hPDLSCs, are indicated through the FPKM (Fragments Per Kilobase of exon model per Million mapped fragments) and graphically depicted in green scale. Gene cluster and stage association analyzed by Cortecon database were also shown.

| GENE      | CTR    | MORINGIN<br>0,25 $\mu$ M | LFC   | Stat.<br>Significant | CLUSTER | STAGE ASSOCIATIONS                                                    |
|-----------|--------|--------------------------|-------|----------------------|---------|-----------------------------------------------------------------------|
| TACC3     | 2,08   | 4,81607                  | 1,21  | yes                  | 1       | Cortical Specification, Upper Layers                                  |
| GADD45B   | 0,45   | 2,75547                  | 2,61  | no                   | 2       | Neural Differentiation, Cortical Specification, Upper and Deep Layers |
| HIST1H2AG | 116,46 | 205,385                  | 0,82  | yes                  | 2       | Neural Differentiation, Cortical Specification, Upper and Deep Layers |
| HIST1H3J  | 9,54   | 16,3133                  | 0,77  | no                   | 2       | Neural Differentiation, Cortical Specification, Upper and Deep Layers |
| HIST1H3H  | 33,03  | 48,3742                  | 0,55  | no                   | 8       | Cortical Specification, Upper Layers                                  |
| PLK4      | 0,15   | 2,016                    | 3,75  | no                   | 8       | Cortical Specification, Upper Layers                                  |
| CDK2      | 1,89   | 6,02959                  | 1,67  | yes                  | 10      | Cortical Specifications                                               |
| DHFR      | 1,68   | 4,75295                  | 1,50  | yes                  | 10      | Cortical Specifications                                               |
| PCDH9     | 0,57   | 0,347581                 | -0,71 | no                   | 10      | Cortical Specifications                                               |
| PSMC3IP   | 5,89   | 16,3018                  | 1,47  | yes                  | 10      | Cortical Specifications                                               |
| TPX2      | 3,78   | 13,522                   | 1,84  | yes                  | 10      | Cortical Specifications                                               |
| TYMS      | 8,77   | 16,4415                  | 0,91  | yes                  | 10      | Cortical Specifications                                               |
| HIST1H2BB | 37,98  | 43,3969                  | 0,19  | no                   | 11      | Deep Layers                                                           |
| HIST1H2BD | 210,01 | 116,148                  | -0,85 | yes                  | 11      | Deep Layers                                                           |
| HIST1H2BF | 100,56 | 104,881                  | 0,06  | no                   | 11      | Deep Layers                                                           |
| HIST1H2BN | 88,53  | 111,179                  | 0,33  | no                   | 12      | Cortical Specification, Neural Differentiation                        |
| CRISPLD2  | 1,55   | 8,80879                  | 2,51  | yes                  | 13      | Neural Differentiation and Upper Layers                               |
| DKK1      | 0,82   | 11,9212                  | 3,86  | yes                  | 13      | Neural Differentiation, Upper Layers                                  |
| ASPM      | 3,02   | 4,32537                  | 0,52  | yes                  | 14      | Cortical Specifications                                               |
| AURKB     | 0,51   | 1,96972                  | 1,95  | no                   | 14      | Cortical Specifications                                               |
| BIRC5     | 0,75   | 3,57498                  | 2,25  | yes                  | 14      | Cortical Specifications                                               |
| BORA      | 0,48   | 1,64764                  | 1,78  | no                   | 14      | Cortical Specifications                                               |
| BRCA1     | 1,20   | 2,50354                  | 1,06  | no                   | 14      | Cortical Specifications                                               |
| C15orf41  | 1,24   | 2,17024                  | 0,81  | no                   | 14      | Cortical Specifications                                               |
| CDC20     | 3,38   | 9,65262                  | 1,51  | yes                  | 14      | Cortical Specifications                                               |
| CDCA5     | 0,11   | 0,344472                 | 1,65  | no                   | 14      | Cortical Specifications                                               |
| CDCA8     | 0,48   | 3,39988                  | 2,82  | no                   | 14      | Cortical Specifications                                               |
| CDK1      | 1,38   | 4,99573                  | 1,86  | yes                  | 14      | Cortical Specifications                                               |
| CEBPD     | 1,00   | 3,45673                  | 1,79  | no                   | 14      | Cortical Specifications                                               |
| CENPA     | 1,07   | 0,988851                 | -0,11 | no                   | 14      | Cortical Specifications                                               |
| CENPE     | 2,08   | 4,56014                  | 1,13  | yes                  | 14      | Cortical Specifications                                               |
| CENPM     | 0,53   | 3,54952                  | 2,74  | no                   | 14      | Cortical Specifications                                               |
| CKAP2     | 3,86   | 12,318                   | 1,67  | yes                  | 14      | Cortical Specifications                                               |
| CKAP2L    | 0,34   | 1,34454                  | 1,98  | no                   | 14      | Cortical Specifications                                               |
| CKS1B     | 5,01   | 27,057                   | 2,43  | yes                  | 14      | Cortical Specifications                                               |
| DEPDC1    | 0,42   | 1,96926                  | 2,23  | no                   | 14      | Cortical Specifications                                               |
| DLGAP5    | 1,97   | 5,43013                  | 1,46  | yes                  | 14      | Cortical Specifications                                               |

**Table S5. Differentially expressed genes involved in cerebral cortex development induced by 0.25  $\mu$ M of moringin.** Heat maps show differentially expressed genes with Log2FoldChange (LFC) (red scale) and a q-value (FDR), hence genes that after treatment with 0.25  $\mu$ M of moringin appear overexpressed and statistically significant. The expression's values in the two conditions, CTR- hPDLSCs and MORINGIN-hPDLSCs, are indicated through the FPKM (Fragments Per Kilobase of exon model per Million mapped fragments) and graphically depicted in green scale. Gene cluster and stage association analyzed by Cortecon database were also shown

| GENE      | CTR    | MORINGIN<br>0,25 $\mu$ M | LFC   | Stat.<br>Significant | CLUSTER | STAGE ASSOCIATIONS                             |
|-----------|--------|--------------------------|-------|----------------------|---------|------------------------------------------------|
| FAM64A    | 1,17   | 1,20782                  | 0,05  | no                   | 14      | Cortical Specifications                        |
| FANCI     | 5,59   | 13,1129                  | 1,23  | yes                  | 14      | Cortical Specifications                        |
| FBXO5     | 0,69   | 2,37136                  | 1,78  | no                   | 14      | Cortical Specifications                        |
| H2AFX     | 6,02   | 10,2035                  | 0,76  | yes                  | 14      | Cortical Specifications                        |
| HIST1H2AD | 100,28 | 34,8097                  | -1,53 | yes                  | 14      | Cortical Specifications                        |
| HJURP     | 1,40   | 6,58742                  | 2,23  | yes                  | 14      | Cortical Specifications                        |
| INCENP    | 2,66   | 10,4293                  | 1,97  | yes                  | 14      | Cortical Specifications                        |
| IQGAP3    | 1,92   | 4,43442                  | 1,21  | yes                  | 14      | Cortical Specifications                        |
| KIF11     | 2,47   | 3,45904                  | 0,49  | no                   | 14      | Cortical Specifications                        |
| KIF14     | 0,55   | 0,465997                 | -0,24 | no                   | 14      | Cortical Specifications                        |
| KIF20A    | 2,96   | 10,2898                  | 1,80  | yes                  | 14      | Cortical Specifications                        |
| KIF22     | 2,45   | 4,2518                   | 0,80  | no                   | 14      | Cortical Specifications                        |
| KIF2C     | 1,86   | 5,70463                  | 1,62  | yes                  | 14      | Cortical Specifications                        |
| KIF4A     | 1,40   | 5,64136                  | 2,01  | yes                  | 14      | Cortical Specifications                        |
| KIFC1     | 1,25   | 3,27046                  | 1,39  | no                   | 14      | Cortical Specifications                        |
| LMNB1     | 2,30   | 3,58703                  | 0,64  | no                   | 14      | Cortical Specifications                        |
| MKI67     | 7,15   | 33,4566                  | 2,23  | yes                  | 14      | Cortical Specifications                        |
| NCAPG     | 1,39   | 4,53732                  | 1,71  | yes                  | 14      | Cortical Specifications                        |
| NDC80     | 2,39   | 6,83292                  | 1,52  | yes                  | 14      | Cortical Specifications                        |
| POLA2     | 0,61   | 2,85328                  | 2,23  | no                   | 14      | Cortical Specifications                        |
| PSRC1     | 0,36   | 1,41184                  | 1,97  | no                   | 14      | Cortical Specifications                        |
| RACGAP1   | 5,39   | 9,14221                  | 0,76  | yes                  | 14      | Cortical Specifications                        |
| RAD51     | 0,37   | 2,685                    | 2,86  | no                   | 14      | Cortical Specifications                        |
| SGOL1     | 0,24   | 1,6878                   | 2,81  | no                   | 14      | Cortical Specifications                        |
| SPAG5     | 3,12   | 7,51403                  | 1,27  | yes                  | 14      | Cortical Specifications                        |
| SPC24     | 2,32   | 0,00                     | -7,86 | no                   | 14      | Cortical Specifications                        |
| SPC25     | 0,00   | 0,70591                  | 6,14  | no                   | 14      | Cortical Specifications                        |
| STIL      | 0,98   | 3,44439                  | 1,81  | no                   | 14      | Cortical Specifications                        |
| SYBU      | 1,07   | 1,32057                  | 0,30  | no                   | 14      | Cortical Specifications                        |
| TOP2A     | 6,35   | 18,8366                  | 1,57  | yes                  | 14      | Cortical Specifications                        |
| TSC22D3   | 0,93   | 0,64743                  | -0,52 | no                   | 14      | Cortical Specifications                        |
| TTK       | 1,12   | 3,64702                  | 1,70  | yes                  | 14      | Cortical Specifications                        |
| UBE2C     | 3,64   | 33,0386                  | 3,18  | yes                  | 14      | Cortical Specifications                        |
| ZNF724P   | 1,44   | 9,44413                  | 2,71  | no                   | 14      | Cortical Specifications                        |
| MAOA      | 1,32   | 3,28999                  | 1,32  | no                   | 17      | Cortical Specification, Deep and Upper Layers  |
| ZBTB16    | 0,00   | 0,00                     | 0,00  | no                   | 18      | Neural Differentiation, Cortical Specification |
| CLSPN     | 0,48   | 2,85409                  | 2,57  | no                   | 19      | Neural Differentiation and Upper Layers        |

**Table S6. Differentially expressed genes involved in cerebral cortex development induced by 0.25  $\mu$ M of moringin.** Heat maps show differentially expressed genes with Log2FoldChange (LFC) (red scale) and a q-value (FDR), hence genes that after treatment with 0.25  $\mu$ M of moringin appear overexpressed and statistically significant. The expression's values in the two conditions, CTR- hPDLSCs and MORINGIN-hPDLSCs, are indicated through the FPKM (Fragments Per Kilobase of exon model per Million mapped fragments) and graphically depicted in green scale. Gene cluster and stage association analyzed by Cortecon database were also shown

| GENE      | CTR   | MORINGIN<br>0,25 $\mu$ M | LFC   | Stat.<br>Significant | CLUSTER | STAGE ASSOCIATIONS                                                    |
|-----------|-------|--------------------------|-------|----------------------|---------|-----------------------------------------------------------------------|
| CENPF     | 1,89  | 5,88614                  | 1,64  | yes                  | 20      | Deep Layers                                                           |
| FANCA     | 0,55  | 3,20803                  | 2,54  | no                   | 20      | Deep Layers                                                           |
| RFC2      | 2,04  | 8,16855                  | 2,00  | yes                  | 20      | Deep Layers                                                           |
| GAR1      | 0,32  | 3,46837                  | 3,44  | no                   | 24      | Cortical Specification, Upper and Deep Layers                         |
| WISP1     | 1,15  | 0,522156                 | -1,14 | no                   | 24      | Cortical Specification, Upper and Deep Layers                         |
| TMPO      | 4,46  | 8,37091                  | 0,91  | yes                  | 25      | Neural Differentiation, Deep Layers                                   |
| HIST1H3G  | 12,92 | 110,008                  | 3,09  | yes                  | 26      | Cortical Specification, Deep Layers                                   |
| CMTM1     | 0,62  | 1,42277                  | 1,20  | no                   | 30      | Cortical Specification, Upper and Deep Layers                         |
| ELN       | 8,92  | 0,00                     | -9,80 | yes                  | 30      | Cortical Specification, Upper and Deep Layers                         |
| IGF2      | 1,13  | 1,61749                  | 0,52  | no                   | 30      | Cortical Specification, Upper and Deep Layers                         |
| HIST1H2BE | 37,32 | 77,5545                  | 1,06  | yes                  | 33      | Deep Layers                                                           |
| PLCE1     | 2,12  | 0,980768                 | -1,11 | no                   | 33      | Deep Layers                                                           |
| RNASEH2A  | 6,13  | 20,5112                  | 1,74  | yes                  | 34      | Neural Differentiation, Cortical Specification                        |
| NAV2      | 0,65  | 4,25729                  | 2,71  | yes                  | 35      | Upper Layers                                                          |
| CEP55     | 1,24  | 6,54121                  | 2,40  | yes                  | 37      | Neural Differentiation                                                |
| HMGB2     | 8,27  | 16,5107                  | 1,00  | yes                  | 37      | Neural Differentiation                                                |
| MMD       | 0,52  | 1,62304                  | 1,64  | no                   | 37      | Neural Differentiation                                                |
| NUSAP1    | 2,45  | 8,72113                  | 1,83  | yes                  | 37      | Neural Differentiation                                                |
| C11orf70  | 2,26  | 3,2644                   | 0,53  | no                   | 38      | Neural Differentiation, Cortical Specification, Upper and Deep Layers |
| HIST1H2AE | 51,55 | 142,053                  | 1,46  | yes                  | 40      | Neural Differentiation, Cortical Specification, Upper Layers          |
| HIST1H2BG | 68,31 | 108,241                  | 0,66  | yes                  | 40      | Neural Differentiation, Cortical Specification, Upper Layers          |
| HIST1H3B  | 26,33 | 130,354                  | 2,31  | yes                  | 40      | Neural Differentiation, Cortical Specification, Upper Layers          |
| HIST1H3D  | 49,05 | 97,2863                  | 0,99  | yes                  | 40      | Neural Differentiation, Cortical Specification, Upper Layers          |
| CCNB1     | 5,72  | 20,9653                  | 1,87  | yes                  | 41      | Neural Differentiation                                                |
| CDC45     | 0,59  | 1,1472                   | 0,96  | no                   | 41      | Neural Differentiation                                                |
| KIF15     | 0,34  | 1,3309                   | 1,97  | no                   | 41      | Neural Differentiation                                                |
| ANLN      | 3,71  | 18,0341                  | 2,28  | yes                  | 42      | Cortical Specifications                                               |
| ARHGAP11A | 5,84  | 8,64071                  | 0,57  | no                   | 42      | Cortical Specifications                                               |
| AURKA     | 4,69  | 27,1687                  | 2,53  | yes                  | 42      | Cortical Specifications                                               |
| BRIP1     | 0,30  | 1,60486                  | 2,42  | no                   | 42      | Cortical Specifications                                               |
| BUB1      | 1,04  | 7,66851                  | 2,88  | yes                  | 42      | Cortical Specifications                                               |
| BUB1B     | 2,07  | 8,92851                  | 2,11  | yes                  | 42      | Cortical Specifications                                               |
| C1orf53   | 0,00  | 2,43736                  | 7,93  | no                   | 42      | Cortical Specifications                                               |
| CCBL1     | 0,76  | 1,42157                  | 0,90  | no                   | 42      | Cortical Specifications                                               |
| CCDC69    | 0,90  | 1,41115                  | 0,65  | no                   | 42      | Cortical Specifications                                               |
| CCNA2     | 1,31  | 6,4643                   | 2,30  | yes                  | 42      | Cortical Specifications                                               |
| CCNB2     | 3,11  | 6,91969                  | 1,15  | yes                  | 42      | Cortical Specifications                                               |

**Table S7. Differentially expressed genes involved in cerebral cortex development induced by 0.25  $\mu$ M of moringin.** Heat maps show differentially expressed genes with Log2FoldChange (LFC) (red scale) and a q-value (FDR), hence genes that after treatment with 0.25  $\mu$ M of moringin appear overexpressed and statistically significant. The expression's values in the two conditions, CTR- hPDLSCs and MORINGIN-hPDLSCs, are indicated through the FPKM (Fragments Per Kilobase of exon model per Million mapped fragments) and graphically depicted in green scale. Gene cluster and stage association analyzed by Cortecon database were also shown



| GENE      | CTR    | MORINGIN<br>0,25 $\mu$ M | LFC   | Stat.<br>Significant | CLUSTER | STAGE ASSOCIATIONS                            |
|-----------|--------|--------------------------|-------|----------------------|---------|-----------------------------------------------|
| CDC25C    | 0,15   | 1,03751                  | 2,79  | no                   | 42      | Cortical Specifications                       |
| CDC7      | 0,70   | 0,549491                 | -0,35 | no                   | 42      | Cortical Specifications                       |
| CDCA2     | 1,19   | 3,03352                  | 1,35  | no                   | 42      | Cortical Specifications                       |
| CENPN     | 1,76   | 6,16506                  | 1,81  | yes                  | 42      | Cortical Specifications                       |
| CKS2      | 7,61   | 28,0652                  | 1,88  | yes                  | 42      | Cortical Specifications                       |
| DIAPH3    | 2,27   | 6,96919                  | 1,62  | yes                  | 42      | Cortical Specifications                       |
| DTL       | 0,31   | 1,73                     | 2,48  | no                   | 42      | Cortical Specifications                       |
| ESCO2     | 0,17   | 1,42932                  | 3,07  | no                   | 42      | Cortical Specifications                       |
| ESPL1     | 0,24   | 0,705713                 | 1,56  | no                   | 42      | Cortical Specifications                       |
| EXO1      | 0,48   | 3,56679                  | 2,89  | yes                  | 42      | Cortical Specifications                       |
| FAM83D    | 1,41   | 3,48579                  | 1,31  | yes                  | 42      | Cortical Specifications                       |
| FANCD2    | 1,28   | 3,27424                  | 1,36  | no                   | 42      | Cortical Specifications                       |
| FEN1      | 1,25   | 2,73202                  | 1,13  | no                   | 42      | Cortical Specifications                       |
| HIST1H3E  | 2,03   | 2,86956                  | 0,50  | no                   | 42      | Cortical Specifications                       |
| HMMR      | 0,29   | 2,71585                  | 3,23  | no                   | 42      | Cortical Specifications                       |
| KIAA0101  | 2,29   | 4,74861                  | 1,05  | no                   | 42      | Cortical Specifications                       |
| KIAA1524  | 0,96   | 3,23622                  | 1,75  | no                   | 42      | Cortical Specifications                       |
| KIF18B    | 0,26   | 1,40759                  | 2,44  | no                   | 42      | Cortical Specifications                       |
| KIF20B    | 0,94   | 5,04065                  | 2,42  | yes                  | 42      | Cortical Specifications                       |
| KIF23     | 1,74   | 9,90608                  | 2,51  | yes                  | 42      | Cortical Specifications                       |
| KPNA2     | 28,83  | 73,3016                  | 1,35  | yes                  | 42      | Cortical Specifications                       |
| MAD2L1    | 0,64   | 1,63895                  | 1,36  | no                   | 42      | Cortical Specifications                       |
| MELK      | 2,07   | 6,70693                  | 1,70  | yes                  | 42      | Cortical Specifications                       |
| NCAPG2    | 2,36   | 6,04363                  | 1,36  | yes                  | 42      | Cortical Specifications                       |
| NEIL3     | 0,95   | 2,5996                   | 1,45  | no                   | 42      | Cortical Specifications                       |
| NUF2      | 0,92   | 4,71624                  | 2,36  | yes                  | 42      | Cortical Specifications                       |
| PORCN     | 8,80   | 23,5098                  | 1,42  | yes                  | 42      | Cortical Specifications                       |
| RAD54L    | 0,67   | 2,26452                  | 1,76  | no                   | 42      | Cortical Specifications                       |
| RECQL4    | 0,22   | 1,24924                  | 2,51  | no                   | 42      | Cortical Specifications                       |
| RIMS1     | 0,58   | 0,00                     | -5,86 | no                   | 42      | Cortical Specifications                       |
| TIMELESS  | 1,43   | 2,8338                   | 0,99  | no                   | 42      | Cortical Specifications                       |
| ZWINT     | 1,08   | 4,8393                   | 2,16  | yes                  | 42      | Cortical Specifications                       |
| CASC5     | 0,74   | 2,09323                  | 1,50  | no                   | 45      | Cortical Specification, Upper and Deep Layers |
| HIST2H2BF | 311,67 | 150,647                  | -1,05 | yes                  | 45      | Cortical Specification, Upper and Deep Layers |
| PRC1      | 5,85   | 12,8617                  | 1,14  | yes                  | 45      | Cortical Specification, Upper and Deep Layers |
| FOXC2     | 4,78   | 5,49017                  | 0,20  | no                   | 47      | Deep Layers                                   |
| GTSE1     | 0,72   | 1,6898                   | 1,23  | no                   | 47      | Deep Layers                                   |

**Table S8. Differentially expressed genes involved in cerebral cortex development induced by 0.25  $\mu$ M of moringin.** Heat maps show differentially expressed genes with Log2FoldChange (LFC) (red scale) and a q-value (FDR), hence genes that after treatment with 0.25  $\mu$ M of moringin appear overexpressed and statistically significant. The expression's values in the two conditions, CTR- hPDLSCs and MORINGIN-hPDLSCs, are indicated through the FPKM (Fragments Per Kilobase of exon model per Million mapped fragments) and graphically depicted in green scale. Gene cluster and stage association analyzed by Cortecon database were also shown

| GENE      | CTR    | MORINGIN<br>0,25 $\mu$ M | LFC   | Stat.<br>Significant | CLUSTER | STAGE ASSOCIATIONS                                          |
|-----------|--------|--------------------------|-------|----------------------|---------|-------------------------------------------------------------|
| HIST1H3F  | 0,00   | 14,1517                  | 10,47 | yes                  | 47      | Deep Layers                                                 |
| MXD3      | 0,21   | 1,28171                  | 2,61  | no                   | 47      | Deep Layers                                                 |
| FBF1      | 0,79   | 0,336546                 | -1,23 | no                   | 49      | Neural Differentiation, Cortical Specification, Deep Layers |
| ITGA10    | 2,78   | 0,974451                 | -1,51 | no                   | 53      | Cortical Specification, Upper Layers, Deep Layers           |
| HIST1H2BJ | 53,78  | 98,2713                  | 0,87  | yes                  | 54      | Cortical Specification, Deep Layers                         |
| CDKN3     | 2,66   | 12,6908                  | 2,25  | yes                  | 62      | Cortical Specification, Upper Layers                        |
| HIST1H4I  | 12,55  | 29,4576                  | 1,23  | no                   | 62      | Cortical Specification, Upper Layers                        |
| HIST3H2BB | 3,16   | 10,4037                  | 1,72  | no                   | 63      | Cortical Specifications                                     |
| TUBA1C    | 203,37 | 770,518                  | 1,92  | yes                  | 63      | Cortical Specifications                                     |

**Table S9. Differentially expressed genes involved in cerebral cortex development induced by 0.25  $\mu$ M of moringin.** Heat maps show differentially expressed genes with Log2FoldChange (LFC) (red scale) and a q-value (FDR), hence genes that after treatment with 0.25  $\mu$ M of moringin appear overexpressed and statistically significant. The expression's values in the two conditions, CTR- hPDLSCs and MORINGIN-hPDLSCs, are indicated through the FPKM (Fragments Per Kilobase of exon model per Million mapped fragments) and graphically depicted in green scale. Gene cluster and stage association analyzed by Cortecon database were also shown

| OSTEOGENESIS |         |                         |       |                                                                                                   |
|--------------|---------|-------------------------|-------|---------------------------------------------------------------------------------------------------|
| GENE         | CTR     | MORINGIN<br>0.5 $\mu$ M | LFC   | Description                                                                                       |
| MYBL2        | 1,22    | 11,37                   | 3,22  | MYB proto-oncogene like 2                                                                         |
| E2F1         | 0,42    | 3,33                    | 2,99  | E2F transcription factor 1                                                                        |
| BRCA1        | 1,20    | 9,02                    | 2,92  | BRCA1, DNA repair associated                                                                      |
| F3           | 0,48    | 3,49                    | 2,87  | coagulation factor III, tissue factor                                                             |
| IGFBP3       | 0,98    | 3,83                    | 1,97  | insulin like growth factor binding protein 3                                                      |
| FZD8         | 0,96    | 3,09                    | 1,68  | frizzled class receptor 8                                                                         |
| FOXM1        | 4,71    | 14,00                   | 1,57  | forkhead box M1                                                                                   |
| PLAT         | 17,16   | 43,29                   | 1,34  | plasminogen activator, tissue type                                                                |
| DUSP1        | 12,20   | 26,65                   | 1,13  | dual specificity phosphatase 1                                                                    |
| FOSL1        | 8,87    | 18,61                   | 1,07  | FOS like 1, AP-1 transcription factor subunit                                                     |
| CRYAB        | 40,20   | 82,03                   | 1,03  | crystallin alpha B                                                                                |
| INHBA        | 7,16    | 14,02                   | 0,97  | inhibin beta A subunit                                                                            |
| TWIST1       | 4,47    | 8,29                    | 0,89  | twist family bHLH transcription factor 1                                                          |
| KLF5         | 2,00    | 3,68                    | 0,88  | Kruppel like factor 5                                                                             |
| TGFBR2       | 50,16   | 90,73                   | 0,86  | transforming growth factor beta receptor 2                                                        |
| CTGF         | 35,05   | 59,04                   | 0,75  | connective tissue growth factor                                                                   |
| CYBA         | 39,78   | 65,63                   | 0,72  | cytochrome b-245 alpha chain                                                                      |
| DEK          | 16,06   | 26,22                   | 0,71  | DEK proto-oncogene                                                                                |
| IGFBP5       | 17,31   | 26,97                   | 0,64  | insulin like growth factor binding protein 5                                                      |
| FOS          | 66,18   | 102,20                  | 0,63  | Fos proto-oncogene, AP-1 transcription factor subunit                                             |
| FASN         | 16,30   | 24,77                   | 0,60  | fatty acid synthase                                                                               |
| INSIG1       | 4,58    | 6,87                    | 0,58  | insulin induced gene 1                                                                            |
| HSF1         | 18,24   | 27,33                   | 0,58  | heat shock transcription factor 1                                                                 |
| PNPLA2       | 17,98   | 26,79                   | 0,58  | patatin like phospholipase domain containing 2                                                    |
| VIMP         | 17,56   | 25,62                   | 0,55  | selenoprotein S                                                                                   |
| SPARC        | 568,80  | 824,37                  | 0,54  | secreted protein acidic and cysteine rich                                                         |
| FAS          | 41,23   | 58,80                   | 0,51  | Fas cell surface death receptor                                                                   |
| PLAUR        | 28,92   | 40,77                   | 0,50  | plasminogen activator, urokinase receptor                                                         |
| GPI          | 86,50   | 118,88                  | 0,46  | glucose-6-phosphate isomerase                                                                     |
| TWIST2       | 27,31   | 37,44                   | 0,46  | twist family bHLH transcription factor 2                                                          |
| IL1R1        | 13,20   | 17,81                   | 0,43  | interleukin 1 receptor type 1                                                                     |
| NCOR2        | 16,40   | 21,84                   | 0,41  | nuclear receptor corepressor 2                                                                    |
| PTPN11       | 129,32  | 170,43                  | 0,40  | protein tyrosine phosphatase, non-receptor type 11                                                |
| NTSE         | 89,56   | 117,80                  | 0,40  | 5'-nucleotidase ecto                                                                              |
| CALR         | 1305,71 | 1696,49                 | 0,38  | calreticulin                                                                                      |
| NCOA3        | 13,79   | 17,70                   | 0,36  | nuclear receptor coactivator 3                                                                    |
| MAP2K1       | 21,53   | 27,21                   | 0,34  | mitogen-activated protein kinase kinase 1                                                         |
| NPM1         | 426,67  | 534,43                  | 0,32  | nucleophosmin                                                                                     |
| SMARCA4      | 31,27   | 38,55                   | 0,30  | SWI/SNF related, matrix associated, actin dependent regulator of chromatin, subfamily a, member 4 |
| GPX1         | 232,29  | 285,87                  | 0,30  | glutathione peroxidase 1                                                                          |
| HSPA9        | 115,66  | 140,73                  | 0,28  | heat shock protein family A (Hsp70) member 9                                                      |
| HMGAI        | 147,77  | 178,05                  | 0,27  | high mobility group AT-hook 1                                                                     |
| RAC1         | 38,09   | 45,23                   | 0,25  | ras-related C3 botulinum toxin substrate 1 (rho family, small GTP binding protein Rac1)           |
| SUMO3        | 26,40   | 31,23                   | 0,24  | small ubiquitin-like modifier 3                                                                   |
| AKT1         | 40,37   | 47,35                   | 0,23  | AKT serine/threonine kinase 1                                                                     |
| HTT          | 7,31    | 8,48                    | 0,21  | huntingtin                                                                                        |
| AXL          | 60,67   | 69,11                   | 0,19  | AXL receptor tyrosine kinase                                                                      |
| CDC42        | 69,35   | 78,38                   | 0,18  | cell division cycle 42                                                                            |
| THBS1        | 985,78  | 1030,17                 | 0,06  | thrombospondin 1                                                                                  |
| DCN          | 1025,12 | 1065,48                 | 0,06  | decorin                                                                                           |
| AKT2         | 29,60   | 26,73                   | -0,15 | AKT serine/threonine kinase 2                                                                     |
| WNT5A        | 59,61   | 53,59                   | -0,15 | Wnt family member 5A                                                                              |

**Table S10. Differentially expressed genes involved in osteogenesis induced by 0.5  $\mu$ M of moringin.** In the table genes sorted by decreasing values of Log2FoldChange (LFC) and involved in the pathway of osteogenesis are shown. For each gene expression levels (FPKM) in the two conditions (green scale) and LFC (blue-yellow scale) are reported.

| OSTEOGENESIS |         |                         |       |                                                                                                   |
|--------------|---------|-------------------------|-------|---------------------------------------------------------------------------------------------------|
| GENE         | CTR     | MORINGIN<br>0.5 $\mu$ M | LFC   | Description                                                                                       |
| CCND1        | 49,36   | 43,90                   | -0,17 | cyclin D1                                                                                         |
| NCOR1        | 22,00   | 19,50                   | -0,17 | nuclear receptor corepressor 1                                                                    |
| NAMPT        | 17,61   | 15,42                   | -0,19 | nicotinamide phosphoribosyltransferase                                                            |
| MAP4K4       | 110,31  | 95,53                   | -0,21 | mitogen-activated protein kinase kinase kinase kinase 4                                           |
| DICER1       | 7,71    | 6,63                    | -0,22 | dicer 1, ribonuclease III                                                                         |
| SOD1         | 470,72  | 404,41                  | -0,22 | superoxide dismutase 1, soluble                                                                   |
| CTNFB1       | 178,84  | 153,45                  | -0,22 | catenin beta 1                                                                                    |
| ITGB1        | 566,52  | 480,57                  | -0,24 | integrin subunit beta 1                                                                           |
| LGALS1       | 1448,63 | 1224,51                 | -0,24 | galectin 1                                                                                        |
| SUMO2        | 159,43  | 133,92                  | -0,25 | small ubiquitin-like modifier 2                                                                   |
| ITGAV        | 53,58   | 44,70                   | -0,26 | integrin subunit alpha V                                                                          |
| ACOX1        | 13,65   | 11,19                   | -0,29 | acyl-CoA oxidase 1                                                                                |
| EIF2AK2      | 10,23   | 8,36                    | -0,29 | eukaryotic translation initiation factor 2 alpha kinase 2                                         |
| WWTR1        | 10,66   | 8,39                    | -0,34 | WW domain containing transcription regulator 1                                                    |
| ANGPT1       | 14,85   | 11,54                   | -0,36 | angiopoietin 1                                                                                    |
| MAF          | 14,38   | 11,15                   | -0,37 | MAF bZIP transcription factor                                                                     |
| ATG7         | 4,77    | 3,69                    | -0,37 | autophagy related 7                                                                               |
| PRKCE        | 9,83    | 7,58                    | -0,37 | protein kinase C epsilon                                                                          |
| JAG1         | 13,69   | 10,47                   | -0,39 | jagged 1                                                                                          |
| MGEA5        | 24,25   | 18,51                   | -0,39 | meningioma expressed antigen 5 (hyaluronidase)                                                    |
| STAT3        | 51,37   | 39,03                   | -0,40 | signal transducer and activator of transcription 3                                                |
| IFNAR1       | 5,10    | 3,86                    | -0,40 | interferon alpha and beta receptor subunit 1                                                      |
| IRF2         | 9,28    | 7,01                    | -0,40 | interferon regulatory factor 2                                                                    |
| EIF2AK4      | 41,12   | 30,96                   | -0,41 | eukaryotic translation initiation factor 2 alpha kinase 4                                         |
| TCF4         | 21,79   | 16,38                   | -0,41 | transcription factor 4                                                                            |
| IFRD1        | 17,29   | 12,78                   | -0,44 | interferon related developmental regulator 1                                                      |
| CDKN1A       | 162,96  | 119,03                  | -0,45 | cyclin dependent kinase inhibitor 1A                                                              |
| LGALS3       | 201,21  | 146,90                  | -0,45 | galectin 3                                                                                        |
| KITLG        | 9,48    | 6,88                    | -0,46 | KIT ligand                                                                                        |
| TRAF3        | 3,59    | 2,59                    | -0,47 | TNF receptor associated factor 3                                                                  |
| S100A6       | 1242,85 | 894,77                  | -0,47 | S100 calcium binding protein A6                                                                   |
| MAPK3        | 37,57   | 26,56                   | -0,50 | mitogen-activated protein kinase 3                                                                |
| STAT1        | 188,99  | 132,26                  | -0,51 | signal transducer and activator of transcription 1                                                |
| FGFR1        | 112,67  | 78,72                   | -0,52 | fibroblast growth factor receptor 1                                                               |
| PDGFC        | 19,04   | 13,20                   | -0,53 | platelet derived growth factor C                                                                  |
| JUNB         | 34,68   | 23,95                   | -0,53 | JunB proto-oncogene, AP-1 transcription factor subunit                                            |
| CD44         | 211,36  | 143,59                  | -0,56 | CD44 molecule (Indian blood group)                                                                |
| HGF          | 44,17   | 29,77                   | -0,57 | hepatocyte growth factor                                                                          |
| SERPINF1     | 799,46  | 527,22                  | -0,60 | serpin family F member 1                                                                          |
| SOCS3        | 7,53    | 4,79                    | -0,65 | suppressor of cytokine signaling 3                                                                |
| GABBR1       | 2,58    | 1,61                    | -0,68 | gamma-aminobutyric acid type B receptor subunit 1                                                 |
| TNFSF12      | 7,58    | 4,71                    | -0,69 | tumor necrosis factor superfamily member 12                                                       |
| JUN          | 38,86   | 23,87                   | -0,70 | Jun proto-oncogene, AP-1 transcription factor subunit                                             |
| TFAP2C       | 12,07   | 7,35                    | -0,72 | transcription factor AP-2 gamma                                                                   |
| SMAD3        | 17,67   | 10,53                   | -0,75 | SMAD family member 3                                                                              |
| RELB         | 2,77    | 1,52                    | -0,87 | RELB proto-oncogene, NF-kB subunit                                                                |
| SMARCD3      | 8,19    | 4,38                    | -0,90 | SWI/SNF related, matrix associated, actin dependent regulator of chromatin, subfamily d, member 3 |
| ITGA2        | 35,82   | 19,07                   | -0,91 | integrin subunit alpha 2                                                                          |
| VEGFA        | 61,43   | 29,03                   | -1,08 | vascular endothelial growth factor A                                                              |
| RBPJ         | 32,99   | 15,07                   | -1,13 | recombination signal binding protein for immunoglobulin kappa J region                            |
| TCF7         | 3,97    | 1,68                    | -1,24 | transcription factor 7 (T-cell specific, HMG-box)                                                 |
| ARRB2        | 4,42    | 1,87                    | -1,24 | arrestin beta 2                                                                                   |
| ITGB3        | 12,75   | 4,75                    | -1,42 | integrin subunit beta 3                                                                           |
| NGF          | 7,11    | 2,38                    | -1,58 | nerve growth factor                                                                               |
| CHRNA1       | 14,78   | 3,63                    | -2,03 | cholinergic receptor nicotinic alpha 1 subunit                                                    |

**Table S11. Differentially expressed genes involved in osteogenesis induced by 0.5  $\mu$ M of moringin.** In the table genes sorted by decreasing values of Log2FoldChange (LFC) and involved in the pathway of osteogenesis are shown. For each gene expression levels (FPKM) in the two conditions (green scale) and LFC (blue-yellow scale) are reported.

| ADIPOGENESIS |         |                    |       |                                                                          |
|--------------|---------|--------------------|-------|--------------------------------------------------------------------------|
| GENE         | CTR     | MORINGIN<br>0.5 µM | LFC   | Description                                                              |
| TSC22D3      | 0,93    | 17,51              | 4,24  | TSC22 domain family member 3                                             |
| KIAA1524     | 0,96    | 4,99               | 2,37  | KIAA1524                                                                 |
| DKK1         | 0,82    | 3,65               | 2,16  | dickkopf WNT signaling pathway inhibitor 1                               |
| SLC29A1      | 2,77    | 11,28              | 2,02  | solute carrier family 29 member 1 (Augustine blood group)                |
| PTTG1        | 33,36   | 119,33             | 1,84  | pituitary tumor-transforming 1                                           |
| KLF4         | 7,27    | 21,17              | 1,54  | Kruppel like factor 4                                                    |
| MYC          | 4,47    | 11,64              | 1,38  | v-myc avian myelocytomatosis viral oncogene homolog                      |
| HLX          | 1,89    | 4,87               | 1,37  | H2.0 like homeobox                                                       |
| NDRG1        | 43,13   | 94,96              | 1,14  | N-myc downstream regulated 1                                             |
| NME1         | 47,37   | 103,14             | 1,12  | NME/NM23 nucleoside diphosphate kinase 1                                 |
| TNC          | 41,07   | 87,30              | 1,09  | tenascin C                                                               |
| PIK3R1       | 9,68    | 19,45              | 1,01  | phosphoinositide-3-kinase regulatory subunit 1                           |
| MIF          | 78,55   | 153,56             | 0,97  | macrophage migration inhibitory factor (glycosylation-inhibiting factor) |
| IRAK1        | 17,92   | 31,50              | 0,81  | interleukin 1 receptor associated kinase 1                               |
| MET          | 5,41    | 9,23               | 0,77  | MET proto-oncogene, receptor tyrosine kinase                             |
| MAPK7        | 4,16    | 7,00               | 0,75  | mitogen-activated protein kinase 7                                       |
| HIF1A        | 57,67   | 94,20              | 0,71  | hypoxia inducible factor 1 alpha subunit                                 |
| SHC1         | 43,73   | 71,23              | 0,70  | SHC adaptor protein 1                                                    |
| ETS1         | 2,59    | 4,07               | 0,65  | ETS proto-oncogene 1, transcription factor                               |
| HSPD1        | 77,68   | 121,38             | 0,64  | heat shock protein family D (Hsp60) member 1                             |
| HRAS         | 23,59   | 36,28              | 0,62  | HRas proto-oncogene, GTPase                                              |
| ADM          | 8,10    | 12,30              | 0,60  | adrenomedullin                                                           |
| FN1          | 4722,61 | 7065,53            | 0,58  | fibronectin 1                                                            |
| PPIF         | 4,32    | 6,30               | 0,55  | peptidylprolyl isomerase F                                               |
| C5           | 2,83    | 4,07               | 0,52  | complement C5                                                            |
| FOXO3        | 4,08    | 5,71               | 0,49  | forkhead box O3                                                          |
| FGF7         | 16,03   | 22,00              | 0,46  | fibroblast growth factor 7                                               |
| BCL6         | 4,40    | 6,01               | 0,45  | B-cell CLL/lymphoma 6                                                    |
| TGFBR1       | 5,55    | 7,52               | 0,44  | transforming growth factor beta receptor 1                               |
| CAV1         | 149,91  | 200,31             | 0,42  | caveolin 1                                                               |
| FBN1         | 405,88  | 516,33             | 0,35  | fibrillin 1                                                              |
| SREBF1       | 7,63    | 9,71               | 0,35  | sterol regulatory element binding transcription factor 1                 |
| CHUK         | 9,76    | 12,40              | 0,35  | conserved helix-loop-helix ubiquitous kinase                             |
| MTOR         | 9,35    | 11,81              | 0,34  | mechanistic target of rapamycin                                          |
| PAF1         | 42,62   | 51,86              | 0,28  | PAF1 homolog, Paf1/RNA polymerase II complex component                   |
| GAPDH        | 1240,72 | 1501,53            | 0,28  | glyceraldehyde-3-phosphate dehydrogenase                                 |
| LEPR         | 21,84   | 25,61              | 0,23  | leptin receptor                                                          |
| SMAD4        | 10,70   | 12,09              | 0,18  | SMAD family member 4                                                     |
| EGR1         | 71,99   | 81,30              | 0,18  | early growth response 1                                                  |
| SREBF2       | 36,07   | 32,64              | -0,14 | sterol regulatory element binding transcription factor 2                 |
| SDCBP        | 84,41   | 75,22              | -0,17 | syndecan binding protein                                                 |
| SASH1        | 16,78   | 14,82              | -0,18 | SAM and SH3 domain containing 1                                          |
| AHR          | 62,94   | 55,36              | -0,19 | aryl hydrocarbon receptor                                                |
| COL18A1      | 58,52   | 51,03              | -0,20 | collagen type XVIII alpha 1 chain                                        |
| EPAS1        | 94,76   | 82,24              | -0,20 | endothelial PAS domain protein 1                                         |
| KDM5B        | 12,72   | 10,89              | -0,22 | lysine demethylase 5B                                                    |
| ERBB2        | 17,75   | 14,99              | -0,24 | erb-b2 receptor tyrosine kinase 2                                        |
| EIF2AK3      | 7,62    | 6,17               | -0,30 | eukaryotic translation initiation factor 2 alpha kinase 3                |
| NFE2L2       | 43,18   | 34,54              | -0,32 | nuclear factor, erythroid 2 like 2                                       |
| NRIP1        | 5,36    | 4,26               | -0,33 | nuclear receptor interacting protein 1                                   |
| SP3          | 9,36    | 7,34               | -0,35 | Sp3 transcription factor                                                 |
| TNFRSF1A     | 112,14  | 87,77              | -0,35 | TNF receptor superfamily member 1A                                       |

**Table S12. Differentially expressed genes involved in adipogenesis in hPDLSCs treated with 0.5 µM of moringin.** In the table genes sorted by decreasing values of Log2FoldChange (LFC) and involved in the pathway of adipogenesis are shown. For each gene expression levels (FPKM) in the two conditions (green scale) and LFC (blue-yellow scale) are reported.

| ADIPOGENESIS |        |                         |       |                                                    |
|--------------|--------|-------------------------|-------|----------------------------------------------------|
| GENE         | CTR    | MORINGIN<br>0.5 $\mu$ M | LFC   | Description                                        |
| ARNT         | 18,52  | 14,46                   | -0,36 | aryl hydrocarbon receptor nuclear translocator     |
| CSF1         | 12,73  | 9,90                    | -0,36 | colony stimulating factor 1                        |
| APP          | 697,76 | 537,93                  | -0,38 | amyloid beta precursor protein                     |
| BNIP3L       | 15,53  | 11,81                   | -0,40 | BCL2 interacting protein 3 like                    |
| ITGA1        | 7,62   | 5,73                    | -0,41 | integrin subunit alpha 1                           |
| IGF1R        | 16,63  | 12,47                   | -0,42 | insulin like growth factor 1 receptor              |
| IL6ST        | 38,01  | 28,30                   | -0,43 | interleukin 6 signal transducer                    |
| IRS1         | 15,67  | 11,43                   | -0,46 | insulin receptor substrate 1                       |
| MAP3K7       | 11,88  | 8,57                    | -0,47 | mitogen-activated protein kinase kinase kinase 7   |
| HMOX1        | 45,99  | 32,53                   | -0,50 | heme oxygenase 1                                   |
| TXNIP        | 47,93  | 32,99                   | -0,54 | thioredoxin interacting protein                    |
| SAV1         | 10,94  | 7,43                    | -0,56 | salvador family WW domain containing protein 1     |
| TLR3         | 4,60   | 3,09                    | -0,57 | toll like receptor 3                               |
| FHL2         | 35,06  | 23,49                   | -0,58 | four and a half LIM domains 2                      |
| CAT          | 144,70 | 96,69                   | -0,58 | catalase                                           |
| STAT2        | 48,00  | 31,93                   | -0,59 | signal transducer and activator of transcription 2 |
| USF1         | 9,50   | 6,31                    | -0,59 | upstream transcription factor 1                    |
| NCOA2        | 9,21   | 6,09                    | -0,60 | nuclear receptor coactivator 2                     |
| RBL2         | 11,16  | 7,35                    | -0,60 | RB transcriptional corepressor like 2              |
| MAP2K3       | 17,18  | 11,27                   | -0,61 | mitogen-activated protein kinase kinase 3          |
| TFAP2A       | 20,49  | 13,32                   | -0,62 | transcription factor AP-2 alpha                    |
| SOC6         | 2,55   | 1,64                    | -0,64 | suppressor of cytokine signaling 6                 |
| THRB         | 4,65   | 2,96                    | -0,65 | thyroid hormone receptor beta                      |
| CASP8        | 12,86  | 8,18                    | -0,65 | caspase 8                                          |
| BAX          | 62,22  | 39,37                   | -0,66 | BCL2 associated X, apoptosis regulator             |
| PSEN2        | 10,48  | 6,55                    | -0,68 | presenilin 2                                       |
| NRG1         | 4,37   | 2,73                    | -0,68 | neuregulin 1                                       |
| PTEN         | 43,21  | 25,81                   | -0,74 | phosphatase and tensin homolog                     |
| GJA1         | 439,36 | 259,16                  | -0,76 | gap junction protein alpha 1                       |
| PPARA        | 2,46   | 1,43                    | -0,78 | peroxisome proliferator activated receptor alpha   |
| INSR         | 2,80   | 1,55                    | -0,85 | insulin receptor                                   |
| BCL3         | 4,56   | 2,43                    | -0,91 | B-cell CLL/lymphoma 3                              |
| DDIT3        | 8,28   | 4,38                    | -0,92 | DNA damage inducible transcript 3                  |
| SQSTM1       | 197,31 | 102,56                  | -0,94 | sequestosome 1                                     |
| MAPK12       | 5,86   | 3,00                    | -0,97 | mitogen-activated protein kinase 12                |
| IRF1         | 6,63   | 3,36                    | -0,98 | interferon regulatory factor 1                     |
| FLT3LG       | 11,88  | 5,98                    | -0,99 | fms related tyrosine kinase 3 ligand               |
| MYD88        | 14,08  | 6,82                    | -1,05 | myeloid differentiation primary response 88        |
| WISP2        | 6,53   | 2,99                    | -1,13 | WNT1 inducible signaling pathway protein 2         |
| SATB1        | 12,95  | 5,84                    | -1,15 | SATB homeobox 1                                    |
| PTX3         | 22,15  | 9,58                    | -1,21 | pentraxin 3                                        |
| PLAU         | 45,56  | 19,44                   | -1,23 | plasminogen activator, urokinase                   |
| CASP1        | 17,76  | 6,60                    | -1,43 | caspase 1                                          |
| BDNF         | 13,31  | 4,71                    | -1,50 | brain derived neurotrophic factor                  |
| NR4A1        | 5,95   | 1,84                    | -1,70 | nuclear receptor subfamily 4 group A member 1      |
| THBS4        | 18,43  | 5,45                    | -1,76 | thrombospondin 4                                   |
| PTH1H        | 8,16   | 2,19                    | -1,90 | parathyroid hormone like hormone                   |
| PGF          | 31,53  | 8,10                    | -1,96 | placental growth factor                            |
| ABCB4        | 5,68   | 1,06                    | -2,43 | ATP binding cassette subfamily B member 4          |
| BMP4         | 79,33  | 13,66                   | -2,54 | bone morphogenetic protein 4                       |
| CXCL12       | 69,94  | 11,81                   | -2,57 | C-X-C motif chemokine ligand 12                    |

**Table S13. Differentially expressed genes involved in adipogenesis in hPDLSCs treated with 0.5  $\mu$ M of moringin.** In the table genes sorted by decreasing values of Log2FoldChange (LFC) and involved in the pathway of adipogenesis are shown. For each gene expression levels (FPKM) in the two conditions (green scale) and LFC (blue-yellow scale) are reported.

| GENE     | CTR     | MORINGIN<br>0.5 $\mu$ M | LFC   | ANNOTATED TERM                                                                                                                 |
|----------|---------|-------------------------|-------|--------------------------------------------------------------------------------------------------------------------------------|
| ZBTB16   | 0,00    | 10,20                   | 13,32 | positive regulation of ossification                                                                                            |
| FOXC2    | 4,78    | 38,11                   | 3,00  | ossification                                                                                                                   |
| IGF2     | 1,13    | 5,59                    | 2,31  | ossification                                                                                                                   |
| DKK1     | 0,82    | 3,65                    | 2,16  | negative regulation of ossification                                                                                            |
| CEBPD    | 1,00    | 4,28                    | 2,10  | positive regulation of osteoblast differentiation                                                                              |
| NOCT     | 0,73    | 2,78                    | 1,92  | negative regulation of osteoblast differentiation                                                                              |
| PAM16    | 4,06    | 10,79                   | 1,41  | ossification                                                                                                                   |
| PTK2B    | 2,98    | 7,07                    | 1,25  | negative regulation of bone mineralization, negative regulation of ossification, regulation of bone mineralization             |
| RORB     | 7,38    | 17,33                   | 1,23  | negative regulation of osteoblast differentiation                                                                              |
| PEX7     | 3,68    | 7,90                    | 1,10  | endochondral ossification                                                                                                      |
| TNC      | 41,07   | 87,30                   | 1,09  | osteoblast differentiation                                                                                                     |
| SMOC1    | 49,73   | 103,96                  | 1,06  | regulation of osteoblast differentiation                                                                                       |
| FBN2     | 118,14  | 221,48                  | 0,91  | positive regulation of bone mineralization, positive regulation of osteoblast differentiation                                  |
| TWIST1   | 4,47    | 8,29                    | 0,89  | negative regulation of osteoblast differentiation, ossification, osteoblast differentiation, regulation of bone mineralization |
| MYBBP1A  | 2,74    | 4,96                    | 0,85  | osteoblast differentiation                                                                                                     |
| ASF1A    | 4,42    | 7,80                    | 0,82  | osteoblast differentiation                                                                                                     |
| FOXC1    | 3,46    | 6,10                    | 0,82  | endochondral ossification, ossification                                                                                        |
| CBS      | 31,61   | 55,00                   | 0,80  | endochondral ossification                                                                                                      |
| FZD1     | 4,41    | 7,49                    | 0,76  | canonical Wnt signaling pathway involved in osteoblast differentiation                                                         |
| CTGF     | 35,05   | 59,04                   | 0,75  | ossification                                                                                                                   |
| FBL      | 24,74   | 41,47                   | 0,75  | osteoblast differentiation                                                                                                     |
| PHB      | 36,43   | 60,76                   | 0,74  | osteoblast differentiation                                                                                                     |
| HIF1A    | 57,67   | 94,20                   | 0,71  | negative regulation of bone mineralization, negative regulation of ossification                                                |
| CREB3L1  | 85,79   | 133,92                  | 0,64  | osteoblast differentiation, regulation of ossification                                                                         |
| IGFBP5   | 17,31   | 26,97                   | 0,64  | negative regulation of osteoblast differentiation                                                                              |
| HSPG2    | 32,59   | 50,51                   | 0,63  | endochondral ossification                                                                                                      |
| IARS     | 82,95   | 127,12                  | 0,62  | osteoblast differentiation                                                                                                     |
| FASN     | 16,30   | 24,77                   | 0,60  | osteoblast differentiation                                                                                                     |
| ZHX3     | 2,14    | 3,24                    | 0,60  | positive regulation of osteoblast differentiation                                                                              |
| SND1     | 55,66   | 80,88                   | 0,54  | osteoblast differentiation                                                                                                     |
| SYNCRIP  | 34,41   | 49,08                   | 0,51  | osteoblast differentiation                                                                                                     |
| ASXL2    | 5,51    | 7,85                    | 0,51  | positive regulation of bone mineralization involved in bone maturation                                                         |
| RPL38    | 254,85  | 360,54                  | 0,50  | ossification                                                                                                                   |
| HDAC7    | 10,65   | 14,67                   | 0,46  | negative regulation of osteoblast differentiation                                                                              |
| SORT1    | 5,52    | 7,60                    | 0,46  | ossification                                                                                                                   |
| TWIST2   | 27,31   | 37,44                   | 0,46  | negative regulation of osteoblast differentiation, osteoblast differentiation                                                  |
| RASSF2   | 17,36   | 23,41                   | 0,43  | ossification, regulation of osteoblast differentiation                                                                         |
| ASPEN    | 20,27   | 27,22                   | 0,43  | bone mineralization                                                                                                            |
| RPS15    | 746,23  | 976,77                  | 0,39  | osteoblast differentiation                                                                                                     |
| SNAI2    | 23,86   | 30,66                   | 0,36  | regulation of osteoblast differentiation                                                                                       |
| PDLIM7   | 17,84   | 22,43                   | 0,33  | ossification, positive regulation of osteoblast differentiation                                                                |
| FAT4     | 6,19    | 7,76                    | 0,33  | ossification involved in bone maturation                                                                                       |
| RRAS2    | 17,32   | 21,40                   | 0,31  | osteoblast differentiation                                                                                                     |
| IMPAD1   | 7,51    | 9,20                    | 0,29  | endochondral ossification                                                                                                      |
| COL1A1   | 7497,36 | 9182,01                 | 0,29  | endochondral ossification, intramembranous ossification                                                                        |
| ALPL     | 16,45   | 20,01                   | 0,28  | endochondral ossification, osteoblast differentiation                                                                          |
| RBMX     | 33,70   | 40,70                   | 0,27  | osteoblast differentiation                                                                                                     |
| ATP5B    | 173,25  | 206,96                  | 0,26  | osteoblast differentiation                                                                                                     |
| AKT1     | 40,37   | 47,35                   | 0,23  | osteoblast differentiation                                                                                                     |
| PSMC2    | 26,35   | 30,81                   | 0,23  | osteoblast differentiation                                                                                                     |
| SNRNP200 | 45,69   | 53,41                   | 0,23  | osteoblast differentiation                                                                                                     |
| DHX9     | 39,82   | 46,44                   | 0,22  | osteoblast differentiation                                                                                                     |
| H3F3B    | 31,56   | 36,05                   | 0,19  | osteoblast differentiation                                                                                                     |
| SBDS     | 56,13   | 64,05                   | 0,19  | bone mineralization                                                                                                            |
| CLIC1    | 121,29  | 137,85                  | 0,18  | positive regulation of osteoblast differentiation                                                                              |
| SMAD4    | 10,70   | 12,09                   | 0,18  | osteoblast differentiation                                                                                                     |
| HNRNPU   | 41,66   | 45,99                   | 0,14  | osteoblast differentiation                                                                                                     |
| MRC2     | 86,02   | 93,46                   | 0,12  | osteoblast differentiation                                                                                                     |
| LMNA     | 1179,18 | 1226,76                 | 0,06  | positive regulation of osteoblast differentiation                                                                              |

**Table S14. Up-regulated differentially expressed genes involved in osteogenesis obtained by GO analysis in hPDLSCs treated with 0.5  $\mu$ M of moringin.** In the table genes sorted by decreasing values of Log2FoldChange (LFC) and involved in the pathway of osteogenesis are shown. For each gene expression levels (FPKM) in the two conditions (green scale) and LFC (blue-yellow scale) are reported.

| GENE    | CTR     | MORINGIN<br>0.5 $\mu$ M | LFC   | ANNOTATED TERM                                                                                                            |
|---------|---------|-------------------------|-------|---------------------------------------------------------------------------------------------------------------------------|
| RPS11   | 1955,38 | 1863,83                 | -0,07 | osteoblast differentiation                                                                                                |
| GNAS    | 905,33  | 856,35                  | -0,08 | endochondral ossification, positive regulation of osteoblast differentiation                                              |
| WNT5A   | 59,61   | 53,59                   | -0,15 | positive regulation of ossification                                                                                       |
| EXT2    | 55,44   | 48,09                   | -0,21 | ossification                                                                                                              |
| HSD17B4 | 117,74  | 101,52                  | -0,21 | osteoblast differentiation                                                                                                |
| CTNNB1  | 178,84  | 153,45                  | -0,22 | positive regulation of osteoblast differentiation, regulation of osteoblast differentiation                               |
| INPPL1  | 30,75   | 26,19                   | -0,23 | endochondral ossification                                                                                                 |
| ADAR    | 51,00   | 42,71                   | -0,26 | osteoblast differentiation                                                                                                |
| CD276   | 24,84   | 20,68                   | -0,26 | positive regulation of bone mineralization, positive regulation of osteoblast differentiation                             |
| BMPR2   | 14,11   | 11,60                   | -0,28 | positive regulation of bone mineralization, positive regulation of ossification                                           |
| DHX36   | 16,33   | 13,27                   | -0,30 | ossification                                                                                                              |
| EIF2AK3 | 7,62    | 6,17                    | -0,30 | bone mineralization, ossification                                                                                         |
| DDX5    | 119,84  | 96,88                   | -0,31 | regulation of osteoblast differentiation                                                                                  |
| MEF2D   | 7,70    | 6,22                    | -0,31 | endochondral ossification, osteoblast differentiation                                                                     |
| CLTC    | 97,20   | 78,31                   | -0,31 | osteoblast differentiation                                                                                                |
| ERCC2   | 22,99   | 18,47                   | -0,32 | bone mineralization                                                                                                       |
| TOB1    | 22,63   | 18,06                   | -0,33 | negative regulation of osteoblast differentiation                                                                         |
| NBR1    | 42,99   | 34,24                   | -0,33 | negative regulation of osteoblast differentiation, regulation of bone mineralization                                      |
| NPR2    | 61,30   | 48,73                   | -0,33 | ossification                                                                                                              |
| BMP1    | 26,40   | 20,90                   | -0,34 | ossification                                                                                                              |
| WWTR1   | 10,66   | 8,39                    | -0,34 | osteoblast differentiation                                                                                                |
| CHSY1   | 24,46   | 19,21                   | -0,35 | negative regulation of ossification                                                                                       |
| SIX2    | 36,71   | 28,80                   | -0,35 | regulation of ossification                                                                                                |
| SP3     | 9,36    | 7,34                    | -0,35 | ossification                                                                                                              |
| MIA3    | 12,15   | 9,51                    | -0,35 | positive regulation of bone mineralization                                                                                |
| NIPBL   | 17,17   | 13,38                   | -0,36 | positive regulation of ossification                                                                                       |
| COL6A1  | 3398,09 | 2645,42                 | -0,36 | osteoblast differentiation                                                                                                |
| CSF1    | 12,73   | 9,90                    | -0,36 | ossification, regulation of ossification                                                                                  |
| STC1    | 8,61    | 6,68                    | -0,37 | ossification                                                                                                              |
| BMPR1A  | 29,02   | 22,35                   | -0,38 | positive regulation of bone mineralization, positive regulation of osteoblast differentiation                             |
| TOB2    | 8,74    | 6,71                    | -0,38 | positive regulation of ossification                                                                                       |
| JAG1    | 13,69   | 10,47                   | -0,39 | positive regulation of osteoblast differentiation                                                                         |
| LTBP3   | 44,16   | 33,68                   | -0,39 | negative regulation of bone mineralization                                                                                |
| NF1     | 18,43   | 13,77                   | -0,42 | osteoblast differentiation                                                                                                |
| IL6ST   | 38,01   | 28,30                   | -0,43 | positive regulation of osteoblast differentiation                                                                         |
| SATB2   | 42,29   | 31,37                   | -0,43 | osteoblast development                                                                                                    |
| TGFBR3  | 31,74   | 23,51                   | -0,43 | osteoblast differentiation                                                                                                |
| FAM20C  | 39,65   | 28,97                   | -0,45 | positive regulation of bone mineralization, positive regulation of osteoblast differentiation                             |
| ACVR1   | 44,39   | 32,03                   | -0,47 | positive regulation of bone mineralization, positive regulation of osteoblast differentiation, regulation of ossification |
| MMP14   | 150,72  | 108,62                  | -0,47 | endochondral ossification, ossification                                                                                   |
| MAPK3   | 37,57   | 26,56                   | -0,50 | regulation of ossification                                                                                                |
| FGFR1   | 112,67  | 78,72                   | -0,52 | negative regulation of osteoblast differentiation                                                                         |
| ECM1    | 222,54  | 154,57                  | -0,53 | negative regulation of bone mineralization, ossification, regulation of bone mineralization                               |
| HDAC4   | 3,22    | 2,23                    | -0,53 | negative regulation of osteoblast differentiation, osteoblast development                                                 |
| JUNB    | 34,68   | 23,95                   | -0,53 | osteoblast differentiation                                                                                                |
| SHOX2   | 4,02    | 2,76                    | -0,54 | osteoblast differentiation                                                                                                |
| GLI3    | 39,46   | 26,71                   | -0,56 | positive regulation of osteoblast differentiation                                                                         |
| EPHA2   | 15,56   | 10,47                   | -0,57 | osteoblast differentiation                                                                                                |
| CAT     | 144,70  | 96,69                   | -0,58 | osteoblast differentiation                                                                                                |

**Table S15. Down-regulated differentially expressed genes involved in osteogenesis obtained by GO analysis in hPDLSCs treated with 0.5  $\mu$ M of moringin.** In the table genes sorted by decreasing values of Log2FoldChange (LFC) and involved in the pathway of osteogenesis are shown. For each gene expression levels (FPKM) in the two conditions (green scale) and LFC (blue-yellow scale) are reported.



| GENE    | CTR     | MORINGIN<br>0.5 $\mu$ M | LFC   | ANNOTATED TERM                                                                                                                                                                                          |
|---------|---------|-------------------------|-------|---------------------------------------------------------------------------------------------------------------------------------------------------------------------------------------------------------|
| ITGA11  | 30,39   | 20,09                   | -0,60 | osteoblast differentiation                                                                                                                                                                              |
| GLA     | 21,09   | 13,85                   | -0,61 | bone mineralization                                                                                                                                                                                     |
| BCOR    | 5,76    | 3,75                    | -0,62 | negative regulation of bone mineralization                                                                                                                                                              |
| TFAP2A  | 20,49   | 13,32                   | -0,62 | positive regulation of bone mineralization                                                                                                                                                              |
| MMP2    | 2237,29 | 1450,83                 | -0,62 | intramembranous ossification                                                                                                                                                                            |
| KREMEN1 | 11,51   | 7,38                    | -0,64 | negative regulation of ossification                                                                                                                                                                     |
| THRB    | 4,65    | 2,96                    | -0,65 | positive regulation of ossification                                                                                                                                                                     |
| TMEM119 | 27,30   | 17,19                   | -0,67 | ossification, osteoblast differentiation                                                                                                                                                                |
| OSR1    | 14,22   | 8,90                    | -0,68 | positive regulation of bone mineralization                                                                                                                                                              |
| GABBR1  | 2,58    | 1,61                    | -0,68 | osteoblast differentiation                                                                                                                                                                              |
| RDH14   | 13,49   | 8,36                    | -0,69 | osteoblast differentiation                                                                                                                                                                              |
| LRP6    | 7,38    | 4,49                    | -0,72 | positive regulation of ossification                                                                                                                                                                     |
| TXLNG   | 2,49    | 1,50                    | -0,73 | regulation of bone mineralization                                                                                                                                                                       |
| HDAC5   | 7,65    | 4,57                    | -0,74 | negative regulation of osteoblast differentiation, osteoblast development                                                                                                                               |
| SMAD3   | 17,67   | 10,53                   | -0,75 | negative regulation of osteoblast differentiation, osteoblast development, osteoblast differentiation                                                                                                   |
| GJA1    | 439,36  | 259,16                  | -0,76 | osteoblast differentiation, positive regulation of osteoblast differentiation, regulation of bone mineralization                                                                                        |
| SLC8A1  | 4,71    | 2,63                    | -0,84 | positive regulation of bone mineralization                                                                                                                                                              |
| SBNO2   | 14,38   | 7,91                    | -0,86 | bone mineralization, ossification                                                                                                                                                                       |
| VCAN    | 336,81  | 182,50                  | -0,88 | osteoblast differentiation                                                                                                                                                                              |
| IFT80   | 26,65   | 14,39                   | -0,89 | osteoblast differentiation                                                                                                                                                                              |
| DCHS1   | 6,81    | 3,54                    | -0,94 | ossification involved in bone maturation                                                                                                                                                                |
| SFRP1   | 6,31    | 3,27                    | -0,95 | negative regulation of ossification, negative regulation of osteoblast differentiation, regulation of ossification                                                                                      |
| EXT1    | 55,32   | 28,62                   | -0,95 | ossification                                                                                                                                                                                            |
| VEGFA   | 61,43   | 29,03                   | -1,08 | positive regulation of osteoblast differentiation                                                                                                                                                       |
| RBPJ    | 32,99   | 15,07                   | -1,13 | negative regulation of ossification                                                                                                                                                                     |
| LRP5    | 17,45   | 7,86                    | -1,15 | negative regulation of osteoblast differentiation                                                                                                                                                       |
| SMO     | 2,74    | 1,15                    | -1,26 | ossification, osteoblast differentiation                                                                                                                                                                |
| DHRS3   | 3,61    | 1,48                    | -1,29 | regulation of ossification                                                                                                                                                                              |
| IFITM1  | 46,36   | 18,23                   | -1,35 | ossification                                                                                                                                                                                            |
| ID3     | 7,83    | 3,03                    | -1,37 | negative regulation of osteoblast differentiation                                                                                                                                                       |
| GREM1   | 71,20   | 24,20                   | -1,56 | negative regulation of bone mineralization, negative regulation of bone mineralization involved in bone maturation, negative regulation of osteoblast differentiation                                   |
| PTH1H   | 8,16    | 2,19                    | -1,90 | bone mineralization, endochondral ossification, osteoblast development                                                                                                                                  |
| BMP4    | 79,33   | 13,66                   | -2,54 | endochondral ossification, ossification, osteoblast differentiation, positive regulation of bone mineralization, positive regulation of ossification, positive regulation of osteoblast differentiation |

**Table S16. Down-regulated differentially expressed genes involved in osteogenesis obtained by GO analysis in hPDLSCs treated with 0.5  $\mu$ M of moringin.** In the table genes sorted by decreasing values of Log2FoldChange (LFC) and involved in the pathway of osteogenesis are shown. For each gene expression levels (FPKM) in the two conditions (green scale) and LFC (blue-yellow scale) are reported.

| GENE     | CTR     | MORINGIN<br>0.5 $\mu$ M | LFC   | ANNOTATED TERM                                                                                                                   |
|----------|---------|-------------------------|-------|----------------------------------------------------------------------------------------------------------------------------------|
| MEX3C    | 0,00    | 10,20                   | 13,32 | positive regulation of fat cell differentiation                                                                                  |
| SNAI2    | 0,42    | 3,33                    | 2,99  | negative regulation of fat cell differentiation                                                                                  |
| NCOR2    | 1,00    | 4,28                    | 2,10  | fat cell differentiation, fat cell differentiation                                                                               |
| CCDC85B  | 0,73    | 2,78                    | 1,92  | positive regulation of fat cell differentiation                                                                                  |
| ALMS1    | 7,27    | 21,17                   | 1,54  | fat cell differentiation                                                                                                         |
| LPIN1    | 1,80    | 5,17                    | 1,52  | positive regulation of fat cell differentiation                                                                                  |
| CEBPD    | 1,70    | 4,21                    | 1,31  | negative regulation of fat cell differentiation                                                                                  |
| FAM120B  | 9,51    | 22,63                   | 1,25  | negative regulation of fat cell differentiation                                                                                  |
| PSMB8    | 12,00   | 24,42                   | 1,02  | regulation of fat cell differentiation                                                                                           |
| RNASEL   | 12,06   | 23,42                   | 0,96  | brown fat cell differentiation, fat cell differentiation, positive regulation of brown fat cell differentiation                  |
| METRNL   | 3,05    | 5,66                    | 0,89  | negative regulation of fat cell differentiation, negative regulation of fat cell differentiation                                 |
| FTO      | 2,00    | 3,68                    | 0,88  | positive regulation of fat cell differentiation                                                                                  |
| ARID5B   | 7,16    | 10,87                   | 0,60  | adipose tissue development, fat pad development                                                                                  |
| HMGA2    | 4,58    | 6,87                    | 0,58  | negative regulation of fat cell differentiation                                                                                  |
| UBB      | 13,90   | 20,70                   | 0,57  | adipose tissue development                                                                                                       |
| LRP5     | 5,51    | 7,85                    | 0,51  | positive regulation of fat cell differentiation                                                                                  |
| ADRM1    | 13,81   | 19,48                   | 0,50  | brown fat cell differentiation                                                                                                   |
| AKT1     | 2,65    | 3,70                    | 0,48  | fat cell differentiation                                                                                                         |
| ARNTL    | 5,52    | 7,60                    | 0,46  | negative regulation of fat cell differentiation                                                                                  |
| ARRDC3   | 16,40   | 21,84                   | 0,41  | negative regulation of fat cell differentiation, white fat cell differentiation                                                  |
| ASXL1    | 3,08    | 4,09                    | 0,41  | fat cell differentiation, regulation of fat cell differentiation                                                                 |
| ASXL2    | 4,25    | 5,54                    | 0,38  | regulation of fat cell differentiation, regulation of fat cell differentiation                                                   |
| BBS4     | 28,34   | 36,73                   | 0,37  | adipose tissue development                                                                                                       |
| CARM1    | 21,93   | 28,42                   | 0,37  | negative regulation of fat cell differentiation                                                                                  |
| CCND1    | 23,86   | 30,66                   | 0,36  | positive regulation of fat cell differentiation, positive regulation of fat cell differentiation, white fat cell differentiation |
| CDK4     | 7,63    | 9,71                    | 0,35  | fat cell differentiation                                                                                                         |
| CMKLR1   | 9,35    | 11,81                   | 0,34  | regulation of brown fat cell differentiation                                                                                     |
| CSF1     | 232,29  | 285,87                  | 0,30  | fat cell differentiation                                                                                                         |
| DDIT3    | 31,56   | 38,71                   | 0,29  | positive regulation of fat cell differentiation                                                                                  |
| E2F1     | 48,94   | 58,70                   | 0,26  | adipose tissue development                                                                                                       |
| EIF2AK3  | 40,37   | 47,35                   | 0,23  | positive regulation of fat cell differentiation                                                                                  |
| GPS2     | 18,81   | 21,88                   | 0,22  | positive regulation of fat cell differentiation                                                                                  |
| GPX1     | 16,57   | 19,15                   | 0,21  | adipose tissue development                                                                                                       |
| GRK5     | 27,03   | 30,71                   | 0,18  | adipose tissue development, regulation of brown fat cell differentiation                                                         |
| IFT88    | 1179,18 | 1226,76                 | 0,06  | negative regulation of adipose tissue development                                                                                |
| INSIG1   | 59,61   | 53,59                   | -0,15 | negative regulation of fat cell differentiation                                                                                  |
| ITGA6    | 49,36   | 43,90                   | -0,17 | fat cell differentiation                                                                                                         |
| JAG1     | 17,11   | 15,17                   | -0,17 | fat cell differentiation                                                                                                         |
| KLF4     | 19,03   | 16,57                   | -0,20 | negative regulation of fat cell differentiation                                                                                  |
| KLF5     | 23,38   | 19,55                   | -0,26 | negative regulation of fat cell differentiation                                                                                  |
| LAMA4    | 21,14   | 17,45                   | -0,28 | fat cell differentiation, fat cell differentiation                                                                               |
| LAMB3    | 7,62    | 6,17                    | -0,30 | fat cell differentiation                                                                                                         |
| LMNA     | 10,66   | 8,39                    | -0,34 | negative regulation of fat cell differentiation                                                                                  |
| LRP6     | 4,88    | 3,81                    | -0,36 | fat cell differentiation                                                                                                         |
| MMP11    | 17,17   | 13,38                   | -0,36 | fat cell differentiation                                                                                                         |
| MTOR     | 12,73   | 9,90                    | -0,36 | mammary gland fat development                                                                                                    |
| NIPBL    | 15,20   | 11,75                   | -0,37 | adipose tissue development                                                                                                       |
| NOCT     | 13,69   | 10,47                   | -0,39 | negative regulation of fat cell differentiation                                                                                  |
| NR1D1    | 28,51   | 21,12                   | -0,43 | fat pad development                                                                                                              |
| NR4A1    | 18,09   | 13,37                   | -0,44 | fat cell differentiation                                                                                                         |
| NUCB2    | 6,44    | 4,71                    | -0,45 | fat cell differentiation                                                                                                         |
| OSBPL11  | 1415,11 | 986,83                  | -0,52 | adipose tissue development, fat pad development                                                                                  |
| OSBPL8   | 10,94   | 7,43                    | -0,56 | positive regulation of fat cell differentiation                                                                                  |
| PER2     | 69,39   | 46,37                   | -0,58 | negative regulation of fat cell differentiation                                                                                  |
| PIK3CA   | 5,61    | 3,70                    | -0,60 | fat pad development                                                                                                              |
| PLCB1    | 64,70   | 40,44                   | -0,68 | fat cell differentiation, fat cell differentiation                                                                               |
| RGS2     | 5,73    | 3,55                    | -0,69 | regulation of fat cell differentiation                                                                                           |
| SAV1     | 7,38    | 4,49                    | -0,72 | negative regulation of fat cell differentiation                                                                                  |
| SELENBP1 | 3,32    | 2,02                    | -0,72 | white fat cell differentiation                                                                                                   |
| SFRP1    | 17,67   | 10,53                   | -0,75 | negative regulation of fat cell differentiation                                                                                  |
| SMAD3    | 17,48   | 10,29                   | -0,76 | brown fat cell differentiation                                                                                                   |
| SORT1    | 4,85    | 2,84                    | -0,77 | fat cell differentiation, fat cell differentiation                                                                               |
| SPG20    | 12,34   | 6,69                    | -0,88 | brown fat cell differentiation                                                                                                   |
| SREBF1   | 8,28    | 4,38                    | -0,92 | negative regulation of fat cell differentiation                                                                                  |
| TBL1X    | 6,31    | 3,27                    | -0,95 | positive regulation of fat cell differentiation                                                                                  |
| TRIB2    | 52,26   | 26,33                   | -0,99 | brown fat cell differentiation                                                                                                   |
| TRIO     | 61,43   | 29,03                   | -1,08 | negative regulation of fat cell differentiation                                                                                  |
| VEGFA    | 12,33   | 5,71                    | -1,11 | adipose tissue development, fat pad development, fat cell differentiation                                                        |
| WNT5A    | 16,50   | 7,57                    | -1,12 | fat cell differentiation, regulation of fat cell differentiation                                                                 |
| WWTR1    | 17,45   | 7,86                    | -1,15 | adipose tissue development, adipose tissue development, positive regulation of fat cell differentiation                          |
| XBP1     | 10,03   | 4,30                    | -1,22 | brown fat cell differentiation                                                                                                   |
| ZBTB16   | 4,16    | 1,62                    | -1,36 | negative regulation of fat cell differentiation                                                                                  |
| ZFP36    | 4,83    | 1,53                    | -1,66 | negative regulation of fat cell differentiation                                                                                  |
| ZFP36L2  | 5,95    | 1,84                    | -1,70 | fat cell differentiation                                                                                                         |

**Table S17. Up and down-regulated differentially expressed genes involved in adipogenesis obtained by GO analysis in hPDLSCs treated with 0.5  $\mu$ M moringin.** In the table genes sorted by decreasing values of Log2FoldChange (LFC) and involved in the pathway of adipogenesis are shown. For each gene expression levels (FPKM) in the two conditions (green scale) and LFC (blue-yellow scale) are reported.

| ONCOGENES |       |                         |       |         |
|-----------|-------|-------------------------|-------|---------|
| GENE      | CTR   | MORINGIN<br>0.5 $\mu$ M | LFC   | q_value |
| BCL11A    | 0,00  | 0,12                    | 16,87 | 1,000   |
| ETV4      | 0,19  | 2,12                    | 3,47  | 1,000   |
| CCND2     | 0,70  | 1,03                    | 0,56  | 1,000   |
| MAFB      | 0,66  | 0,78                    | 0,24  | 1,000   |
| PIM1      | 1,88  | 1,97                    | 0,07  | 1,000   |
| MAML2     | 8,51  | 8,87                    | 0,06  | 0,618   |
| CBLB      | 12,74 | 13,12                   | 0,04  | 0,761   |
| BCL2      | 0,00  | 0,00                    | 0,00  | 1,000   |
| CDX2      | 0,00  | 0,00                    | 0,00  | 1,000   |
| EVI1      | 0,00  | 0,00                    | 0,00  | 1,000   |
| LCK       | 0,00  | 0,00                    | 0,00  | 1,000   |
| MYB       | 0,00  | 0,00                    | 0,00  | 1,000   |
| MYCN      | 0,00  | 0,00                    | 0,00  | 1,000   |
| TCL1A     | 0,00  | 0,00                    | 0,00  | 1,000   |
| USP6      | 0,00  | 0,00                    | 0,00  | 1,000   |
| GOPC      | 2,90  | 2,86                    | -0,02 | 0,938   |
| SS18      | 17,10 | 15,94                   | -0,10 | 0,411   |
| BRAF      | 15,34 | 14,02                   | -0,13 | 0,353   |
| DDX6      | 20,90 | 19,03                   | -0,13 | 0,075   |
| AKT2      | 29,60 | 26,73                   | -0,15 | 0,032   |
| BCR       | 7,38  | 6,63                    | -0,15 | 0,220   |
| ELK4      | 4,99  | 4,46                    | -0,16 | 0,474   |
| CCND1     | 49,36 | 43,90                   | -0,17 | 0,003   |
| PLAG1     | 0,47  | 0,41                    | -0,21 | 1,000   |
| ERBB2     | 17,75 | 14,99                   | -0,24 | 0,019   |
| MAF       | 14,38 | 11,15                   | -0,37 | 0,008   |
| MITF      | 2,60  | 1,94                    | -0,42 | 0,152   |
| SMO       | 2,74  | 1,15                    | -1,26 | 0,002   |
| KIT       | 0,58  | 0,05                    | -3,68 | 1,000   |

| TUMOR SUPPRESSOR GENES |       |                         |       |         |
|------------------------|-------|-------------------------|-------|---------|
| GENE                   | CTR   | MORINGIN<br>0.5 $\mu$ M | LFC   | q_value |
| CDH11                  | 42,96 | 40,85                   | -0,07 | 0,14951 |
| CDK6                   | 0,92  | 1,66                    | 0,86  | 1,0000  |
| CREB1                  | 2,27  | 2,01                    | -0,18 | 1,0000  |
| FH                     | 43,51 | 43,20                   | -0,01 | 0,92638 |
| GPC3                   | 0,94  | 0,81                    | -0,22 | 1,0000  |
| IL2                    | 0,00  | 0,00                    | 0,00  | 1,0000  |
| JAK2                   | 2,72  | 1,99                    | -0,45 | 0,06889 |
| MDM4                   | 1,36  | 1,12                    | -0,27 | 1,0000  |
| MEN1                   | 9,60  | 11,44                   | 0,25  | 0,11484 |
| PML                    | 34,45 | 30,49                   | -0,18 | 0,05082 |
| SOCS1                  | 1,03  | 2,66                    | 1,36  | 0,10327 |
| SYK                    | 0,00  | 0,00                    | 0,00  | 1,0000  |
| TCF3                   | 4,41  | 4,74                    | 0,10  | 0,63441 |
| TNFAIP3                | 0,70  | 2,06                    | 1,56  | 1,0000  |
| PALB2                  | 4,07  | 5,37                    | 0,40  | 0,04424 |

**Table S18. Oncogenes and Tumor Suppressor genes expression.** In the heat maps expression levels (FPKM) (green scale), LFC (red scale) and q\_value (blue scale) which corresponds to FDR statistical test (False Discovery Rate) of oncogenes and tumor suppressor genes in the two conditions CTR- hPDLSCs and 0.5  $\mu$ M MORINGIN- hPDLSCs were described. The resulting values appear, in most cases, not statistically significant. The heat maps indicate that genes belonging to these two groups are not differentially expressed in the two conditions.
